# Supplementary material for: Lipoarabinomannan biosynthesis in Corynebacterineae: the interplay of two α(1→2)-mannopyranosyltransferases MptC and MptD in mannan branching
Source: PubMed Central journal article supplement (PMC3123699; doi:10.1111/j.1365-2958.2011.07640.x), 2011-06

## SUPPLEMENTARY MATERIAL

**Supplementary Table S1: Primers used for plasmid and strain construction.** Restriction sites are in bold, and overhangs required for hybridisation in the second PCR in italics. Primers are given in their 5' to 3' direction.

| Primer                  | Sequences                                                     |
|-------------------------|---------------------------------------------------------------|
| <i>A<sub>mptC</sub></i> | CGTT <b>AAGCTT</b> TGTGTGCTAACTGCGTAATACTCGCGAC               |
| <i>B<sub>mptC</sub></i> | <i>CCCATCCACTAAACTTAAACATCACCGTGCATGAAAAATAGTGTATCCG</i>      |
| <i>C<sub>mptC</sub></i> | <i>TGTTTAAGTTTAGTGGATGGGTGGTTACTGCCGTATTTAGTTGTG</i>          |
| <i>D<sub>mptC</sub></i> | GTTT <b>GGATCC</b> ATAACCGTAGTCAAATGCAGAGTCTTGAGC             |
| <i>E<sub>mptC</sub></i> | CATTTGTGCCAACAACACGTGGTCATATGCG                               |
| <i>F<sub>mptC</sub></i> | GCGGATGCGATCACCGTCAACGC                                       |
| <i>A<sub>mptD</sub></i> | CGCT <b>TCTAGAGGATC</b> ATTCCACAATTCCTACCCTCAG                |
| <i>B<sub>mptD</sub></i> | <i>CCCATCCACTAAACTTAAACAATGTGCTGTCTGGGGGTTC</i>               |
| <i>C<sub>mptD</sub></i> | <i>TGTTTAAGTTTAGTGGATGGGTGGGTCTTGGGCTGAAAG</i>                |
| <i>D<sub>mptD</sub></i> | GCGG <b>GAATTCCAGGCGGAATCC</b> CACATTGAGTTC                   |
| <i>E<sub>mptD</sub></i> | GTGATCATCGCAGTCGCAGTTGCTGC                                    |
| <i>F<sub>mptD</sub></i> | GCATGGGCCACGACAAGGTTCGC                                       |
| Ex-2100<br>RBS for      | GATTAT <b>GTCGACAAGGAGATATAGATGATGCACGGT</b> GAAAACTTG<br>TGG |
| Ex-2100 rev             | GATATT <b>GAATTC</b> TCAAATGAGCGCTTTGTTTTGATTG                |
| Ex-2097<br>RBS for      | GATTAT <b>GTCGACAAGGAGATATAGATGTTGACGAACCC</b> CAGACAG<br>C   |
| Ex-2097 rev             | GATATT <b>GAATTC</b> CCTATTTGGATATTTTGGGAAATGC                |
| Ex-Rv2181-<br>for       | GTGCTGCAGAAGGAGATATAGATATGAATTCGCCCTTGGTGGTCCG<br>G           |
| Ex-Rv2181-<br>rev       | CACGGATCCTTAGACGGTCACGGTCAGGCTG                               |

## SUPPLEMENTARY MATERIAL

**Supplementary Figure S1: Characterization of chromosomal deletions in three different *C. glutamicum* mutants.** Chromosomal DNA was prepared from the wild-type (WT), the deletion mutant *C. glutamicum*  $\Delta mptD$  (D2097), the deletion mutant *C. glutamicum*  $\Delta mptC$  (D2100), and the double deletion mutant *C. glutamicum*  $\Delta mptC \Delta mptD$  (D2100D20970). This served as template for PCR amplifications with primers specific for *mptC* (Probe-2100), and *mptD* (Probe-2097). A “+” denotes amplification with the specific primer pair. On the right standards are given with their size in kb.

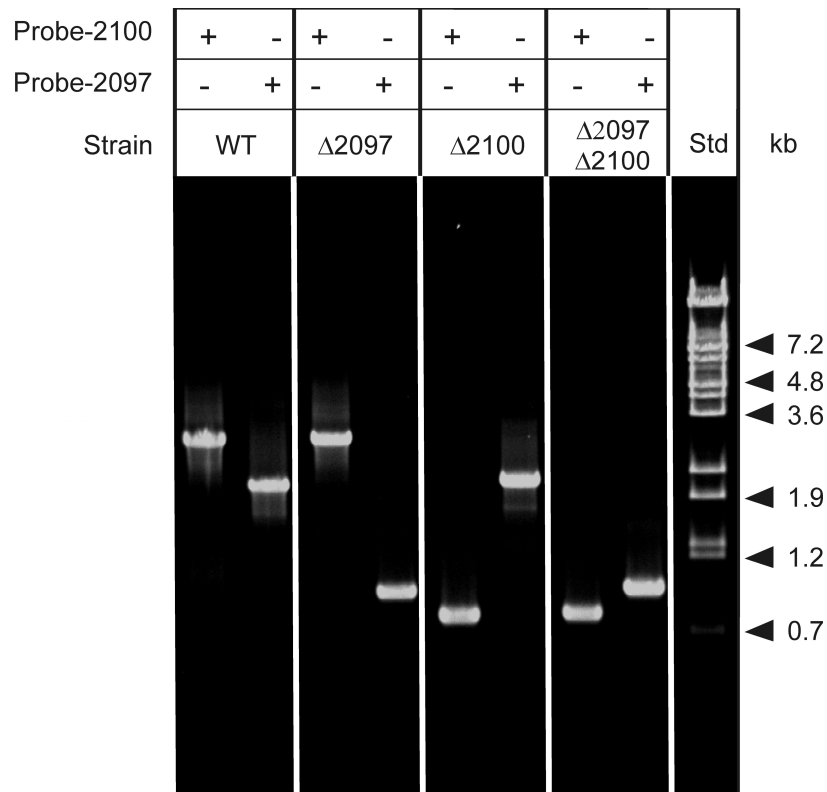

## SUPPLEMENTARY MATERIAL

**Supplementary Figure S2: Lipoglycan profiles of mutant and complemented strains of *C. glutamicum*.** Lipoglycans were extracted from *C. glutamicum*  $\Delta$ mptC, *C. glutamicum*  $\Delta$ mptC pEKEX2-Cg-mptD, *C. glutamicum*  $\Delta$ mptD, *C. glutamicum*  $\Delta$ mptD pEKEX2-Cg-mptC, and analyzed using SDS-PAGE and visualized using a Pro-Q emerald glycoprotein stain (Invitrogen). Lipoglycan profiles are represented with standard molecular weight markers of glycoproteins of 180, 82, 42, and 18 kDa.

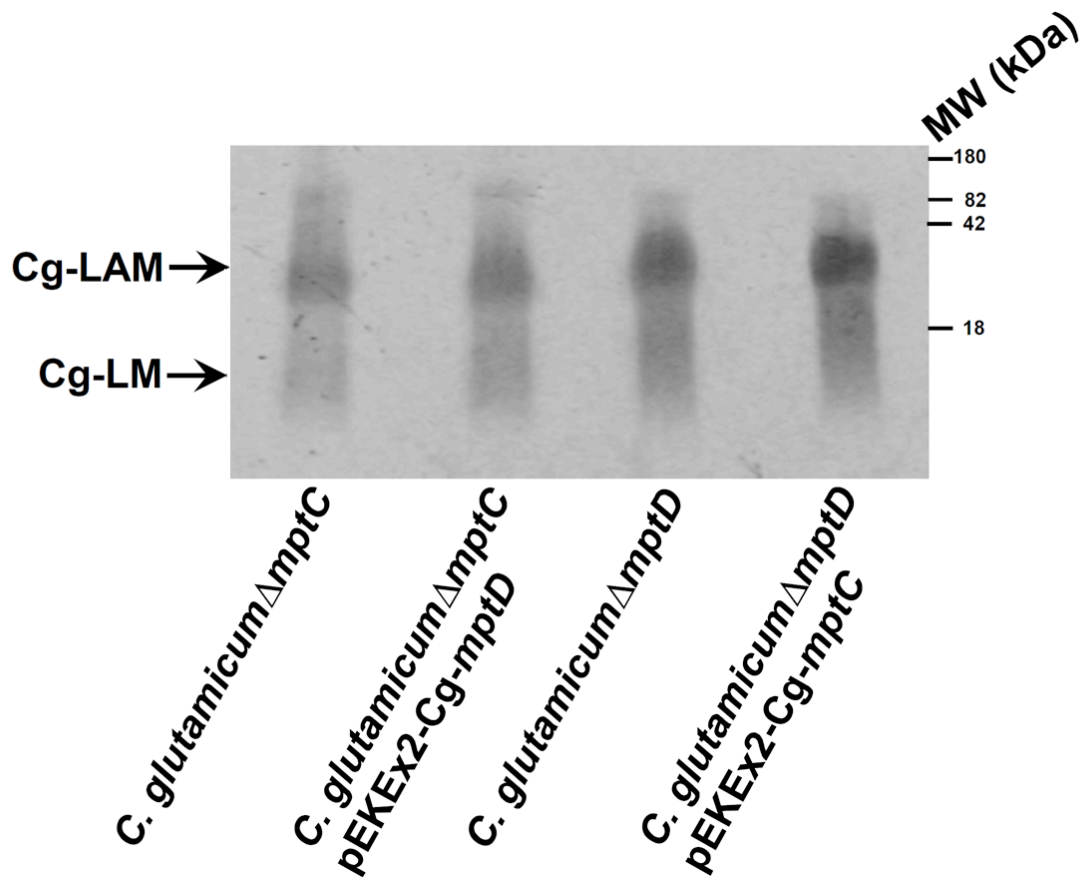

## SUPPLEMENTARY MATERIAL

Supplementary Figure S3: Glycosyl compositional analysis of purified Cg-LM (A) and Cg-LAM (B) from different strains of *C. glutamicum*. Samples of individually purified lipoglycans were hydrolysed with 2M TFA, reduced and per-*O*-acetylated and subjected to GC analysis.

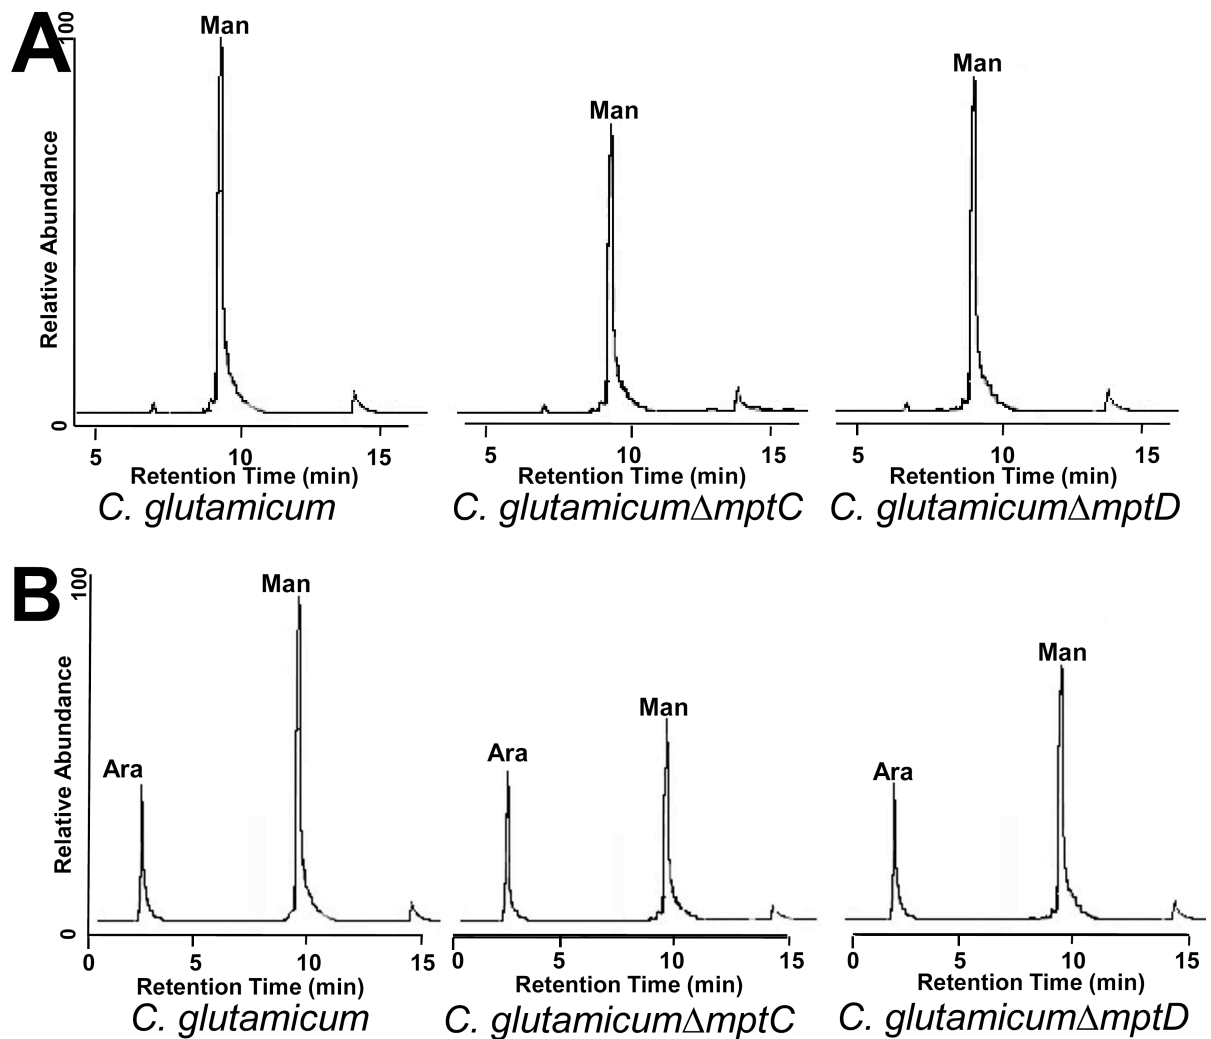

## SUPPLEMENTARY MATERIAL

Supplementary Figure S4: GC-MS of per-*O*-methylated alditol acetate derivatives from Cg-LAM purified from *C. glutamicum*Δ*mptC*Δ*mptD* (A) and the identification of 2,3,4-tri-*O*-CH<sub>3</sub>-1,5,6-tri-*O*-COCH<sub>3</sub>-mannitol with the characteristic fragment alditol cleavage ions *m/z* 102, 118, 129, 162, 189, and 233 (B). GC-MS peaks marked (\*) are non-carbohydrate impurities from the per-*O*-methylation and alditol acetate preparation procedures.

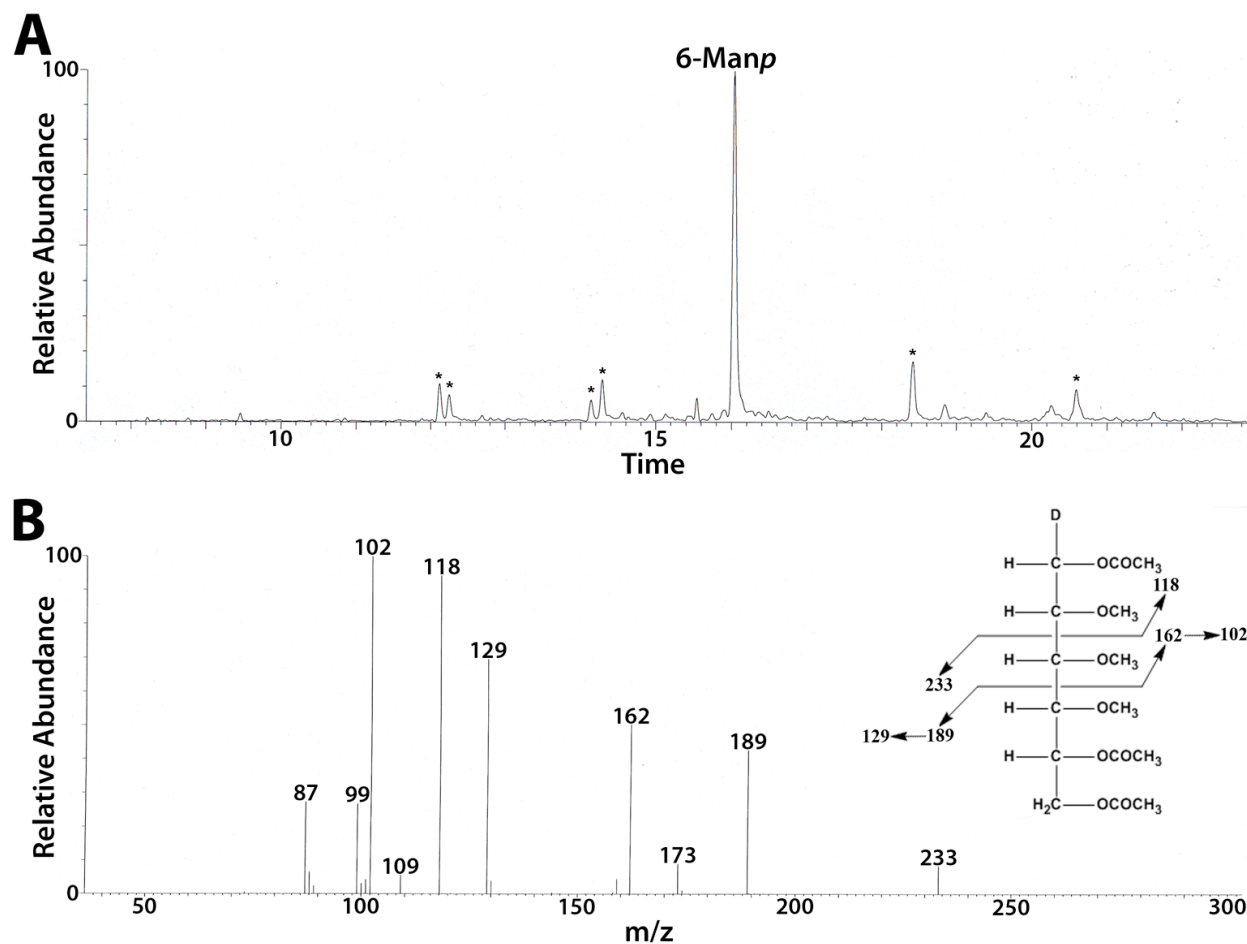

Supplement: mmi0080-1241-SD1.pdf [file mmi0080-1241-SD1.pdf]
